# Supplementary material for: Bioinformatics analysis of the structural and evolutionary characteristics for toll-like receptor 15
Source: PeerJ. 2016 May 25;4:e2079. doi: 10.7717/peerj.2079 (PMC4888287; doi:10.7717/peerj.2079)
Supplement: Data S1 — Raw data. [file peerj-04-2079-s003.xlsx]

## Sheet: Sheet1
No.	Taxon	Scientific Name	Accession No.	Length (bp)	Seq
1	Aves	Anas platyrhynchos	XM_005018870	2595	ATGGGGATCCTTATCAGAAGTCTTCATTTCTACTTCACTTCCTTCTTACTCAGCAGAGCAAATGGCTTCCTAACTTGGAGAACTACTGAGTCTGCCTTCCCATTTTATAACTACTCGTACTTAAACCTCTCTTCTGTATCAGAAGCACAAGCTCCCAAAATGGCGAGAGCTCTCAACTTCTCACACAACATAATTGAAAAAATAACCAAGAGAGACTTTGAAGGCTTTGATGCACTGGAAGTTTTAGACCTTTCCTACAATCAGATTAAGGACATTGAACCTGGCACATTTGAGATTCTGCTCAGCCTTGTTTCTGTGAATTTATCTTTTAACGATAAGAAACTTCTTGTATCTGGTCTTGCACCTCACCTGAAACTCTTAGCAACTAGCAGAGCCTCT…
2	Aves	Anser anser	JQ014619	2598	ATGGGGATCCTTATCAGAAGTCTTCATTTCTACTTCACTTCTTTCTTATTCAGCAGAGCAAATGGCTTCCTAACTTGGAGAACACCTACCGAGTCTGCCTTCCCATTTTATAACTACTCATACTTAAACCTCTCTTCTGTATCACAAGCACAAGCTCCCAAAATGGCAAGAGCTCTCAACTTCTCACACAACGTAATTGAAAAAATAACCAAGAGAGACTTTGAAGGTTTTGATGCACTGGAAGTTTTAGACCTTTCCTACAATCGGATTAAGGACATTGAACCCGGCACATTTGAGACTATGCTCAGCCTTGTTTCTGTGAATTTAACTTTTAATGATAAGAAACTTCTTGTATCTGGTCTTGCACCTCACCTGAAACTCTTAGCAACTAGCAGAGCC…
3	Aves	Apaloderma vittatum	XM_009870709	2616	ATGAGGATCCTTACTGAAAGCCTTCATTTCTACTTAATCTCTTTCTTATTCAGTGGAGCAAATGGATTCCTCACTCCAAGAACACCTACAGCCTATGCCTTCCCATTTTGTAACTACTCCTATCTAAATCTCTCTTCTGTATCAGAAGCACAAGCTCCAAAAACTGCAAGAGCTCTCAACTTCTCACACAACTTGATTGAAAAAATAACCAAGAGAGACTTGGAAGGTTTTGACGCGCTGGAAGTTTTAGACCTCTCCTACAACCTGATTAAGGACGTTGAAAGTGGTGCATTGGAGAGTCTGTTCAGCCTGGTTTCTGTCAATTTATCATTTAACGATAAGAAACTTCACGTATCAGATCTTCCACCCTACCTGAAGCTCTTACCCACTAGCAAAGCC…
4	Aves	Aptenodytes forsteri	XM_009288440	2625	ATGAGGATCCTTACTGGAAGCCTTCATTTCTACTTCATTTCTTTCTTATTCAGTAGAGCAAATGGATTCCTAACTCCGAGAACACCTACAGCCTATGCCTTCCCGTTTTATAACTATTCTTATTTAAACCTCTCTTCTGTATCAGAAGCACAAGCTCCAAAAACGGCAAGAGCTCTCAATTTCTCACATAACGTAATTGAAAAAATAACCAAGAGAGACTTGGAAGGCTTTGACACGCTGGAAGTTTTAGACCTTTCCTACAATCAGATTAAGGACATTGAACCTGGTGCGTTTGAGAGGCTGCTCAGCCTTGTTTCCGTGAATTTATCATTTAATGCTAAGAAACTTCTTGTATCGGGTCTTCCGCCCCACCTGAAGCTCTTACCCACTAGCGAAGCC…
5	Aves	Balearica regulorum gibbericeps	XM_010298512	2625	ATGAGAATCCTTATTGGAAGCCTTCATTTCTACTTCATTTCTTTCTTATTCAGTAGAGCAAATGGATTCCTAACTCTGAGAACACCTACAGCCTATGCCTTCCCATTTTATAACTACTCCTATTTAAACCTCTCTTCTGTATCAGAAGCACAAGCTCCAAAAACAGCAAGAGCTCTCAATTTCTCCCATAATGTAATTGAAAAAATCACCAAAAGAGACTTGGAAGGTTTTGATGTGCTGGAAGTTTTAGACCTTTCCTACAATCAGATTAAGGACATTGAACCTGGTGCGTTTGAGAGTCTGCTCAGCCTTGTCTCTGTGAATTTATCGTTTAACGATAAGAAACTTCTCGTACCAGGTCTTCCAGCCCACCTGAAGCTCTCGCTCGCTAGCGAAGCC…
6	Aves	Buceros rhinoceros silvestris	XM_010142512	2613	ATGAGGATCCTTACTGGAAGCCTTTGTTTCTTCTTCATTTCGTTCTTATTCAACAGCACAAATGGGCTGCCGACTCTGGGAACACCTACAGCCTACGCCTTCCCCTTTTTTAACTACTCCTGCTTAAACCTCTCTTCTGTAGCAGAAGCACGGGCTCCAAAAACGGCAAGAGCTCTCAACCTCTCTCACAATGCAATTGAAAAAATAACCAAGAGAGACTTGGAAGGTTTTGACGCGCTGCAAGTGTTAGACCTCTCCTACAACCAGATTAAGGACATTGAGCCTGGTGCATTTGAGAGTCTGCTCAGCCTTGTTTCCGTGAATTTATCATTCAACCATGAGAACCTGCTTGTCTCAGGGCTTCCACCCCACCTGGAGCTCTTACCCTCTAGCAAAGCC…
7	Aves	Calypte anna	XM_008493258	2628	ATGAAGATCCTTATTGGAAGCCTTCGTTTCTACTTCATTTGTTTCTCATTCAGTAGAGCAAATGGCTTCATAACTCGGAGAACATCTACAGTCCATGCCCCTCTGTTTTACGACTACTCCTATTTAAACCTCTCTTCAGTAACGGAAGCACAAGCTCCAAAAACAGCAAGAGCTCTCAATTTCTCTCATAACATAATTAGAAAAATAAACAAGAGAGATTTGGAAGGTTTTGACTCCCTGGAAGTATTAGACCTTTCCTACAATCTGATTAAGGATGTTGAACCTGGTGTGTTTGAGAGTCTCCTCAGCCTCGTTTCTGTGAATTTGTCATTTAATGATAAGACACTTCTTGTATCAAGTCTTCCACCTCACCTGGAGCCCTTACCCACAAGCAAAACC…
8	Aves	Caprimulgus carolinensis	XM_010174731	2622	ATGAGGATCCTCATCGGAAGTCTTCATTTCTACTTCATTTCTTTCTTAGTCAGTAGAACAAATGGATTCCTAACTCTGAGAAGACCTACAGCCCATGCCTTCCCATTTTATAACTACTCCTATTTAAACCTCTCTTCTGTATCAGAAGCACAAGCTCCAAAAACGGCAAAAGCTCTCAATTTCTCACATAACATAATTGAAAAAATAACCAAAAGAGACTTGGAAGGCTTTGATGCACTGGAAGTTTTAGACCTTTCCTACAATCAGATTATGGACATTGAACCTGGTGTGTTTGAGAATCTGCTCAGCCTTGTTTCTGTGAATTTATCATTTAATGATAAGAAACTTTTTGTATCGGGTCTTCCACCCCACCTGAAGGTCTTACCCACTAGCAAAGCC…
9	Aves	Cariama cristata	XM_009706095	2625	ATGAGGATCCTTATTGGAAGCCTTCATTTCTACTTCATTTCTTTCTTATTCAGTAGAGCAAACGGATTCCTAACTCTGAGAACACCTACAGCCTACGCCTTCCCATTTTATAACTACTCCTATTTAAACCTCTCTTCTGTATCAGAAGCACAAGCTCCAAAACTGGCAAGAGCTCTCAATTTCTCACATAACATCATAGAAAAAATAACCAAGAGAGACTTGGAAGGTTTTGACGCGCTGGAAGTTTTAGACCTTTCCTACAATCAGATTAAGGACATTGAACCTGGTGCGTTTGAGAGTCTGCTCAGCCTTGTTTCCGTGAATTTATCATTCAATGATAAGAAACTTCTTGTATCAAGTCTTCCACCTCATCTGAAGCTCTTACCCACTAGCAAAGCC…
10	Aves	Chaetura pelagica	XM_010004652	2625	ATGAGGATCCTTATTGGAAGCCTTCATTTCTACTTAATTTCTTTCTTATTCAGTAGAGCAAGGGGCTTCGTAACTTTGAGAACACCTACAGCCTATGCCCTCCCATTTTATAACTACTCCTATTTAAACCTCTCTTCAGTATCAGAAGCACAGGCTCCGAACACAGCAAAAGCTCTCAACTTCTCACATAACCTAATTGAAAAAATAACCAGGAGAGACTTTGAAGGTTTTGATGTGCTGCAAGTGTTAGACCTTTCCTACAATCAGATTAAGGACATTGAAGCTGGAGTGTTTGAGAGCCTGCTCAGCCTTGTTTCTGTGAATTTATCATTCAACGATAAGAATCTTCTTGTATCGGGTCTCCCACCTCACCTGAAGTTCTTGCCCACTAGCAAAGTC…
11	Aves	Charadrius vociferus	XM_009886001	2625	ATGAAGATCCTTATTGGAAGCCTTCATTTCTACTTCATTTCTTTCTTATTCAGTAGAGCAAACGGATTCCTAACTCGGAGAACACGTACAGCCTATACCTTCCCATTTTATAACTACTCCTATTTAAACCTCTCTTCTGTATCAGAAGCACAAGCTCCACTAACAGCAAGATCTCTCAATTTCTCACATAATGTAATTGAAAAAATAACCAAGAGAGACTTGGAAGGTTTTGAGGCGCTGGAAGTTTTAGACCTTTCCTACAATCAAATTAAGGACATTGAACCCGGTGCGTTTGAGAGTCTGCTCAGCCTTACTTCTGTGAATTTATCATTTAACGATAAGAAACTTCTTGTATCAGGTCTTCCACCCCACCTGAAGCTCTCACCTGTGAGCAAAGCC…
12	Aves	Chlamydotis macqueenii	XM_010125500	2625	ATGAGGATCCTTATTGGAAGTCTTCATTTCTACTTAATTTCATTCTTACTCAGTAGAGGAAATGGATTCCTAACTCCAAGAACACCTGCAGCCCACGCCGTCCCGTTTTATAACTACTCCTATTTAAACCTCTCTTCTGTATCAGAAGCACAAGCCCCAAAAATGGCAAGAACTCTCGATTTCTCACATAACAACATTGAAAAAATAACCAAGAGAGACTTGGAAGGTTTTGACGTGCTGGAAGTTTTAGACCTTTCCCACAATCAGATTCAGGACATTGAGCCTGGCGCGCTTGCGAGCCTGCTCAGCCTCGTTTCTGTGAATTTGTCATTTAACGATAAGAAACTTCTCGTGTCGGATCTCCCACCCCACCTGAAGCTCTTGCCCACCAGCGAAGCC…
13	Aves	Colius striatus	XM_010206127	2577	ATGAGGATCCTTATTGGAAGCCTTCATTTCTACTTCATGCCTTTCTTACTCAGCAGAGCAAATGGATCCCTAACTCAGACCCCTGCAGCCTATGCCTCCCCAGTTTATAACTACTCCTATTTAAACCTCTCTTCTGTATCAGAAGCACGAGCTCCAAAAACGGCAAGAGCACTCAATTTCTCACACAACGTCATTGGAAGCATCACCAAGAGGGACCTGGAGGGTTTTGTTCTGCTGCAAGTTTTAGACCTTTCCTATAACCAGATTAAGGACATTGAACCTGGTGCATTTGAGAGTCTGCCCTGCCTTGCTTCTGTGGATTTATCATTTAACAGTAAGGAACTTGTTGTATCGGATCTTCCAGCCCCCCTGAAGCTCTCACCCACTAGTGAAGCCTCG…
14	Aves	Columba livia	XM_005513180	2517	ATGAAGCCCCTGATTGGAAGCTTTCATTTCTACTTCATTTCTTTCTTACTCAGCAGAGCAAAGGGGCTCCCAGCTCTGAGAGCACCCACAGCCTCCGTCTCCCCCTTCTACACCTACTGCTATTTAAACCTCTCCTCTGTAGCAGAGGCACAAGCTCCCAAAACGGCCAGAGCTCTCAATTTCTCACATAACCTCATCAAGAAAATAACCAAGAGAGACTTGGAAGGTTTCGATGCGCTGGAAGTTCTAGACCTTTCCCACAACCAGATTCGGGACATCGAGCCTGGCGCGTTTGAGCGTCTGCCCAGCCTCCTGTCTGTGAACTTATCATTTAACGACAAGAGCCTTCTTGCGGCGGGTCTGCCGCCCCCCCTGAAGCTCAACCCCGCTCGCGAGGCC…
15	Aves	Corvus brachyrhynchos	XM_008642044	2625	ATGAGGATCCTTCCTGGCTGCCTTCATTTCTGCTTCATTCCTCTCTTACTCAGCAGAGCACATGGATTCCTAACATGGAGAACACCTCCAGCCTTCCTGGTATATAACTACTCCTATTCAAACCTCTCCTCTGTCTCAGAAGCACAAGCTCCAAAAACAGCGAGAGCTCTCAATTTCTCACACAATGTCATTGAAAAAATAACCAAGAGAGACTTGGAAAGATTTGCCAGGTTGGAAGTTCTAGACCTTTCCTACAATCGGATCAGGGATGTTGAGCCTGGAGCGTTCCAGAGTCTGCTCAGCCTGGTTTCTGTGGATTTATCATTTAATTACGAGAAGCTGCTTCTGTCAAATCTCCCACCCCACCTGAAGCTCTCACCCGCTGGCAAAGCTCCGGGG…
16	Aves	Corvus cornix cornix	XM_010402971	2625	ATGAGGATCCTTCCTGGCTGCCTTCATTTCTGCTTCATTCCTCTCTTACTCAGCAGAGCACATGGATTCCTAACATGGAGAACACCTCCAGCCTTCCTGGTATATAACTACTCCTATTCAAACCTCTCCTCTGTCTCAGAAGCACAAGCTCCAAAAACAGCGAGAGCTCTCAATTTCTCACACAATGTCATTGAAAAAATAACCAAGAGAGACTTGGAAAGATTTGCCAGGTTGGAAGTTCTAGACCTTTCCTACAATCGGATCAGGGATGTTGAGCCTGGAGCGTTCCAGAGTCTGCTCAGCCTGGTTTCTGTGGATTTATCATTTAATTACGAGAAGCTGCTTCTGTCAAATCTCCCACCCCACCTGAAGCTCTCACCCGCTGGCAAAGCTCCGGGG…
17	Aves	Coturnix coturnix	HM773176	2607	ATGAGGATCCTTATTGGGAGTCTTTATTTCTACTTCATTTCTTTCTTATTCAGTAAAGTAAATGGATTCCTAATTCAGAGAACATCTCCAGTGTCTTCCTTCCCATTTTATAACTACTCTTACTTAAACCTCTCTTCTGTATCAGAAGCACGAGCTCCCAAAACAGCAAGAGCTCTCAACTTCTCCCATAATGCAATTGAAAAAATAACCCAAAGAGACTTTGAAGGTTTTGATGTCCTAGAAGTTCTGGACCTTTCCTACAATCACATTAAGGACATTGAACCTGGCGCATTTGAGAACCTGCTCAGTCTTGTTTCTGTGGATTTATCATTTAATGATAAGAATCTTCTGGTATCTGGTCTTGCAGCTCGCCTGAAACTCAAACTGAGCAGCGGAGCT…
18	Aves	Cuculus canorus	XM_009560965	2625	ATGAGGATCCTTATTGGAAGTCTTCATTTCTATTTCATTTCTTTCCTATTCAGTAGAGCAAATGGATTTCTAACTCTGAGAACACCTGCAGCCTATACCTTCCCGGCTTATAACTACTCCTATTTAAACCTCTCTTCTGTATCAGAAGCACAAGCTCCAAAAGCAGCCAGAGCTCTCAATTTCTCACATAATGTAATTGAAAAAATAACCAAGAGAGATATGGAAGGTTTTGATGTGCTAGAAGTTTTAGACCTTTCCTACAATCAGATTAAGGACATTGAACCTGGTGTGTTTGAGAGTCTGCTCAGCCTTGTTTCTGTGAATTTATCATTTAATGATCAGAAACTTCTTGTATCAGGTCTTCCACCTCACCTGAAGCTCTTACCCACTAGCCAAGCC…
19	Aves	Egretta garzetta	XM_009640695	2625	ATGAGGATCCTTATTGGAAGCCTTCATTTCTACTTCATTTCTTTCTTATTCAGTGGAGCAAAGGGATTCCTAACTCTGAGGACACCCACAGCCTATACCTTCCCATTTTATAACTACTCCTATTTAAACCTCTCTTCCGTATCAGAAGCACAAGCTCCAAAAACAGCAAGAGCTCTCAATTTCTCACATAACTTAATTGAACAAATAACCAAGAGAGACTTGGAAGGTTTTGACACGCTGGAAGTTTTAGACCTTTCCTACAATCGGATTAAGGACATCGAACCCGGTGCGTTCGAGAGGCTGCTCAGCCTCGTTTCTCTGAATTTATCATTTAATGATAAGAAGCTTCTTGTACTGGGTCTTCCACCCCACCTGAAGCTCTTAACCAGTAGCGAAGCC…
20	Aves	Eurypyga helias	XM_010151478	2616	ATGAGGATCCTTATCGGAAGCCTGTGTTTCTACTTCATTTCTTCCTTACTTGGTAGAGCAAATGGATTCCTGCCCCTGAGAGCAGCCACAGCCCTTGCCTTCCCCTTTTACGACTACTCCTATTTAAACCTCTCTTCCATATCAGAAGCGCGAGCTCCAAAAACAGCAAGAGCTCTCAATTTCTCACATAACGTCATTGAAAAAATAACCAGGAGAGACATGGAAGGGTACGAGGCGCTGGAAGTTTTAGACCTTTCCTACAATCGGATTAAGGACGTCGAACGCGGTGCCTTCGAGAGTCTGCTCGGCCTCGTTTCTGTGAATTTATCATTTAATGACGAGAAACTTCTCGTACCGGCTCTTCCACCTGCCCTGAAGCTCTCCCCCACTGGCAAAGCC…
21	Aves	Falco cherrug	XM_005445628	2622	ATGAGGATTGTTATTGGAAGCCTTCATTTCTACTTCACCTCTTTCTTACTGAGTGGAGCAAATGGATTCCTAACCCTGAGAACACCTACAGCCTATGCCTTCCCGGTTTATAACTACTCCTATTTAAACCTCTCTTCTGTATCAGAAGCAGAAGCTCCAAAAGCGGCAAAAGCTCTCAATTTCTCACATAATGTAATTGAAAAAATAACCAAGAGAGACTTGGAAGGTTTTGACACGCTGGAAGTTTTAGACCTTTCCTACAATCAGATTAAGGACATTGAACCCGGTGCCTTTGAGGGCCTGCTCAGCCTTGTTTCTGTGGATTTATCATTTAACGATCAGAGACTTGTATCGCGTCTTCCACCCCATCTGAAGCTCCTACCCACCAGCAAAGCCTCA…
22	Aves	Falco peregrinus	XM_005235036	2619	ATGAGGATTGTTATTGGAAGCCTTCATTTCTACTTCACCTCTTTCTTACTGAGTGGAGCAAATGGATTCCTAACCCTGAGAACACCTACAGCCTATGCCTTCCCGGTTTATAACTACTCCTATTTAAACCTCTCTTCTGTATCAGAAGCACAAGCTCCAAAAGCGGCAAAAGCTCTCAATTTCTCACATAATGTAATTGAAAAAATAACCAAGAGAGACTTGGAAGGTTTTGACACGCTGGAAGTTTTAGACCTTTCCTACAATCAGATTAAGGACATTGAACCCGGTGCCTTTGAGGGCCTGCTCAGCCTTGTTTCTGTGGATTTATCATTTAACGATCAGAGACTTGAATCGCGTCTTCCACCCCATCTGAAGCTCCTACCCACCAGCAAAGCCTCA…
23	Aves	Ficedula albicollis	ENSFALG00000015347	2628	ATGAGGATCCTTCCTGGCTGCCTTCTGAATTTCTACTTCATTCCTTTCTTACTCAGCAGAGCGCACGGATTCCTAAGGTGGAGAACACCTCCAGCCTTCCTGGTTTACAACTACTCCTATTCAAATCTCTCCTCTGTCTCAGAAGCACAAGCTCCAAAAACAGCAAGAGCTCTCAATTTCTCACACAATGTCATTGAAAAAATTACCAAGAGAGACTTGGAAGGATTTGACTGGCTGGAAGTTCTGGACTTTTCCTACAATCGGATCAGGGCTGTTGAGCCTGGAGCATTCCAGAGCCTGCTCAGCCTGGTTTCTGTGGATTTATCATTTAATGATGAGAAGCTGCTCCTGTCAGATCTCCCACCCCACCTGAAGCTCTCACCCACTGGCAAAACTCCG…
24	Aves	Fulmarus glacialis	XM_009586905	2625	ATGAGGATCCTTATTGGAAGCCTTCACTTCTACTTCATTTCTTTCTTATTCAGTAGAGCAAATGGATTCCTAACTCTGAGAACACCTACAGCCTATGCCTTCCCATTTTATAACTACTCCTATTTGAACCTCTCTTCTGTATCAAAAGCACAAGCTCCAAAAACGGCAAGAGCTCTCAATTTCTCACATAACGTAATTGAAAAAATAACCAAGAGAGACTTGGAAGGTTTCGACATGCTGGAAGTTTTAGACCTTTCCTACAATCAGATTAAGGACATTGAACCTGGTGCGTTTGAGAGGCTGCTCAGCCTTGTTTCTGTGAATTTATCATTTAATGATAAGAAACTTCTCGTATCGGGTCTTCCACCCCACCTGAAGCTCTCACCCGCTAGCGAAGCC…
25	Aves	Gallus gallus	NM_001037835	2607	ATGAGGATCCTTATTGGGAGTCTTTATTTCTACTTCATTTCTTTCTTATTCAGTAAAGTAAATGGATTCCTAACTCAGAGAACATCTCCAGTGTCTTCCTTCCCATTTTATAACTACTCTTACTTAAACCTCTCTTCTGTATCACAAGCACAAGCTCCCAAAACAGCGAGAGCTCTCAACTTCTCATATAATGCAATTGAAAAAATAACCAAAAGAGACTTTGAAGGTTTTCATGTACTGGAAGTTTTGGACCTTTCTCACAATCACATTAAGGACATTGAACCTGGTGCATTTGAGAACCTGCTCAGCCTTGTTTCTGTGGATTTATCATTTAATGATAAGAATCTTCTGGTATCTGGTCTTGCACCTCACCTGAAACTCATACCGACCAGCGGAGCC…
26	Aves	Gallus lafayetii	FJ915220	2607	ATGAGGATCCTTATTGGGAGTCTTTATTTCTACTTCATTTCTTTCTTATTCAGTAAAGTAAATGGATTCCTAACTCAGAGAACATCTCCAGTGTCTTCCTCCCCATTTTATAACTACTCTTACTTAAACCTCTCTTCTGTATCACAAGCACAAGCTCCCAAAACAGCAAGAGCTCTCAACTTCTCATATAATGCAATTGAAAAAATAACCAAAAGAGACTTTGAAGGTTTTCATGTACTGGAAGTTTTGGACCTTTCTCACAATCACATTAAGGACATTGAACCTGGTGCATTTAAGAACCTGCTCAGCCTTGTTTCTGTGGATTTATCATTTAATGATAAGAATCTTCTGGTATCTGGTCTTGCACCTCACCTGAAACTCATACCGACCAGCGGAGCC…
27	Aves	Gallus sonneratii	FJ915243	2607	ATGAGGATCCTTATTGGGAGTCTTTATTTCTACTTCATTTCTTTCTTATTCAGTAAAGTAAATGGATTCCTAACTCAGAGAACATCTCCAGTGTCTTCCTTCCCATTTTATAACTACTCTTACTTAAACCTCTCTTCTGTATCACAAGCACAAGCTCCCAAAACAGCAAGAGCTCTCAACTTCTCATATAATGCAATTGAAAAAATAACCAAAAGAGACTTTGAAGGTTTTCATGTACTGGAAGTTTTGGACCTTTCTCACAATCACATTAAGGACATTGAACCTGGTGCATTTGAGAACCTGCTCAGCCTTGTTTCTGTGGATTTATCATTTAATGATAAGAATCTTCTGGTATCTGGTCTTGCACCTCAACCGAAACTCATACCGACCAGCGGAGCC…
28	Aves	Gavia stellata	XM_009821678	2625	ATGATGATCCTTATTGGAAGCCTTCATTTCTACTTCATTTCTTCCTTACTCAGTAGAGCAAATGGATTCCTAACCCTGAGAACACCTACGGCCCATGTCTTCCCGTTTTATAACTACTCCTATTTAAACCTCTCTTCTCTAGCAGAAGCACAAGCTCCAAAAACGGCAAGAGCTCTCAATTTCTCACATAACGTAATTGAAAAAATAACCAAGAAAGACTTGGAAGGTTTCGATGCGCTGGAAGTTTTAGACCTTTCCTACAATCGGATTAAGGACATTGAACCTGGTGCGTTTGAGAGGCTGCTCAGCCTTGTTTCTGTGAATTTATCGTTTAATGATAAGACACTTCTTGTACCAGGTTTTCCACCCCACCTGAAGCTCTTACCCACTAGCGAAGCC…
29	Aves	Geospiza fortis	XM_005422603	2625	ATGAGGATCCTTCCTGGCTGCTTTCATTTCTACTTCATTCCCTTCTTACTCAGCCAGGCACATGGATTCCTAATGTGGAGAACACCTCCAGCCTTCCTGGTTTATAACTACTCCTATTCAAATCTCTCCTCTGTCTCAGAAGCACGGGCTCCAAAAACAGCAAGAGCTCTCAATTTCTCACACAATGTCATTGAAAAAATTACCAAGGGAGACTTGGAAGGATTTGACTGGCTGGAAGTTCTGGACTTTTCCTACAATCAGATCAGGGCTGTTGAGCCTGGAGCATTCCAGAGTCTGCTCAGCCTGGTTTCTGTGGATTTATCATTCAATGATGAGAAGCTGCTTCTGCCAGATCTCCCACCCCACCTGAAGCTCTCACCTGCTGGCAAAGCTCCGAGG…
30	Aves	Haliaeetus albicilla	XM_009927303	2622	ATGAGGATCCTTACCAGAACCCTTCATTTCTACTTCATTTCTTTCTTACTTAGTAGAGCAAATGGATTCCTCACTCTGAGAACACCCACAGCCTATACCTTCCCATTTTATAACTACTCCTACTTAAACCTCTCTTCTGTATCAGAAGCACAAGCTCCAAAAATGGCAAGAGCTCTCAACTTCTCACATAATGTAATTGAAAAAATAACCAAGAGAGACTTGGAAGGTTTTGACGCGCTGGAAGTTTTAGACCTTTCCTACAATCAGATTAAGGACATTGAACCTGGTGCATTTGAGAGTCTGCCCAGCCTTGTTTCTGTGAATTTATCATTTAACAAGAACCTTCTTGTACCAGGTCTTCCACCCCACCTGAAGCTCTTACCCACTAGCAAAGCCTCA…
31	Aves	Haliaeetus leucocephalus	XM_010574879	2625	ATGAGGATCCTTACCAGAACCCTTCATTTCTACTTCATTTCTTTCTTACTTAGTAGAGCAAATGGATTCCTCACTCTGAGAACACCCACAGCCTATACCTTCCCATTTTATAACTACTCCTACTTAAACCTCTCTTCTGTATCAGAAGCACAAGCTCCAAAAATGGCAAGAGCTCTCAACTTCTCACATAATGTAATTGAAAAAATAACCAAGAGAGACTTGGAAGGTTTTGACGCGCTGGAAGTTTTAGACCTTTCCTACAATCAGATTAAGGACATTGAACCTGGTGCATTTGAGAGTCTGCCCAGCCTTGTTTCTGTGAATTTATCATTTAACAATAAGAACCTTCTTGTACCAGGTCTTCCACCCCACCTGAAGCTCTTACCCACTAGCAAAGCC…
32	Aves	Leptosomus discolor	XM_009953779	2625	ATGAGAATCCTTATTGGAAGCTTTCGCTTCTACTTCATTTCTTTCTTATTCAGTAGAGCAAATGGATTTCTAACTCTGAGAAGACCTACAGCCTATGCCTTCCCAGTATGTAACTACTCCTATTTAAATCTCTCTTCTGTATCAGAAGCACAAGCTCCAAAAACAGCAAGAGTTCTCAATTTCTCACACAACATAATTGAAAAAATAACCAAGAAAGACTTGGAAGGTTTTGACGCGCTGGAAGTTTTAGACCTTTCCTACAATCAGATTAAGGATATTGAACCTGGTGCATTTGAGAGTCTGCTCAGCCTTGTTTCTGTGAATTTATCATCTAATGATAGGAAACTTCTTGTATCAGGTCTTCCACCACACCTGAAGCTCTTACCCACTAGTAAAGCC…
33	Aves	Manacus vitellinus	XM_008924845	2634	ATGAGGGTCCTTCCTGGCTGCCTTCATCTCTACTTCATTTCCTTTTTGTTCAGTGGAGCACATGGATTCCTAACGTGGAGAATACCCACAGCCTTCCCAGTTTATAACTACTCCTATTCCAACCTCTCCTCTGTCTCAGAAGCACAAGCTCCCAAAACAGCAAGAGCTCTCAATTTCTCACATAACGTCATCGAAAAAGTAACCAAGAGGGACTTAGAAGGTTTTGAGGCGCTGGAAGTTCTGGACCTTTCCTACAATCGGATTCGGGATGTTGAGCCCGGTGCACTCCAGAGCCTGCTCAGCCTGGTTTCTGTGAATTTGTCATTCAATGATGAGAAGCTGCTTCTGTCAGGTCTCCCACCCCACCTGGAACTCTTACCCACCGGCAACGCCTCGGGG…
34	Aves	Meleagris gallopavo	ENSMGAG00000015891	2604	ATGAGGGTCCTTACCGGAAGTCTTTATTTCTGCTTCATTTCTTTCTTATTCAGTAGAGCCAATGGATTCCTAGTTCAGACAACATCTCCAATGTCTTCCTTCCCATTTTATAACTACTCTTACTTAAACCTCACTTCTGTATCAGAAGCACAAGCTCCCAAAACAGCAAGAGCTCTGAACTTCTCACATAATGCAATTGAAAAAATAACCAAAAGAGACTTTGAAGGTTTTGATGTACTGGAAGTTTTGGACCTTTCCTACAACCACATTAAGGACATTGAACCTGGTGCATTTGAGAACCTGCTCAGCCTTGTTTCTGTGGATTTATCATTTAATGATGAGAATCTTCTGGTATCTGGTCGTGCATCTCACCTGAAACTCATACCAACCAGTGGGGCT…
35	Aves	Melopsittacus undulatus	XM_005144697	2622	ATGAGGATCCTTATTGGAAGCCTTCATTTCTACTCCATTTCTTTCTTCCTCAGTGGAGCAAATGGGTTTCTAACTGAGGGAACACCGACAGCCTATACCTTCCCCTTCTACAACTACTCCTACTTGAACCTCTCCTCCATATCAGAAGCAGGAGCTCCCAGAACAGCCAGAGCTCTCAATCTCTCACATAATGCAATAGAAAAGGTGACCAAGAGAGACTTGGAAGGTTTTAGCACATTGGAAGTTCTAGACCTTTCCTACAACCGGATTAAGGACATTGAACCAGGAGCATTCGAGAGCCTGCCCAGCCTCACTGCTGTGGATCTGTCATTCAATGACAAGGAACTGGTTGTGTCGGGTCTCCCAGCCCATGTGAAGCTCACACCCACCACCAAGCCC…
36	Aves	Merops nubicus	XM_008943754	2610	ATGAGGATCCTTTTTGGAAGTCTTTGTTTCTGCTTCATTTCTTTCTTACTCAGCAGAGCAAATGGATTCCTAACTCTGAGAACACCTACAGCCTATACCTTCCCTGTTTATAACTACTCCTATTTAAACCTCTCTTCTGTGGCAGAAGCACAAGCTCCAAAAACAGCTAGAGCTCTCAATTTCTCACATAACGTCATTGAGAAAATAACCAAGAGGGACTTGGAAGGTTTTGATGTGCTGGAAGTTTTAGATCTTTCCTACAACCAGATTAAGGAGGTGGAACCTGGTGTGTTTGAGAGCCTGCCCAGCCTTGTTTCTGTGAATTTATCATTCAATGATGAGAAGCTTCTTGTCTCAACCCTGGCGCCCCCCCTGAAGCTCTTACCCGCTGGCAAAGCC…
37	Aves	Mesitornis unicolor	XM_010182944	2625	ATGAAGATCCTTATTGGAAGTCTTCATTTCTACTTCATGTCTGTCTTATTCAGTAGAGCAAATGGATCCCTAACTCTGAGAACACCTTCAGCCTACGCCTTCCCGTTTTGTAACTACACTTATTTAAACCTCTCTTCTGTATCAGAAGCGCAAGCTCCAAAGACGGCGAGAGCTCTCAATTTCTCACATAACGTAATTGAAAAAATAACCAAGAGAGACCTGGAAGGTTTTGATGTGCTGGAAGTTTTAGACCTTTCCTACAATCAGATTAAGGACATTGAACCTGGTGCATTTGAGAGGCTATTCAGCCTTGTTTCTGTGAATTTATCATTTAATGATAAGAAGCTTCTTGTGCCAGGTCTGCCACCGCACCCGAAGCTCTTACCCCCTAGCCAAGCC…
38	Aves	Nestor notabilis	XM_010013070	2622	ATGAAGATCCTTATTGGAAGCCTTCATTTCTACTCAGTTTCTTTCTTACTCAGTGGAGCAAGTGGATTTCTAACTCAGAGAACACCTACAGCCTACACCTTCCCCTTCTACAACTACTCCTACTTGAACCTCTCTTCTATATCAGAAGCAGGAGCTCCCAAAACAGCCAGAGCTCTCAATTTCTCACATAATGCAATAGAAAAGATAACCAAGAGAGACTTGGAAGGTTTTGGCATGTTGGAAGTTCTAGACCTTTCCTACAACCAGATTAAGGACATCGAACCAGGCGCGTTTGAGAGTCTGCTCAGCCTCACTGCTGTGGATCTGTCATTCAATGATAAGGAACTTATTGTGTCGGGTCTCCCACCCCACCTGAAGCTCTCACCCACCCCCAAACCC…
39	Aves	Nipponia nippon	XM_009476126	2625	ATGAGGATCCTTATTGGAAGCCTTCATTTCTACTTCATTTCTGTCTTATTCAGCAGAGCAAACGGATTCCTAGCTTGGAGGACACCTACAGCCTATGCCTTCCCCTTTTATAACTACTCCTATTTAAACCTCTCTTCTGTACCAGAAGCACAAGCTCCAAAAACAGCAAGAGCTCTCAATTTCTCACATAACATAATTGAAAAAATAACCAAGAGAGACTTGGAAGGTTTTGACATGCTGGAAGTTTTAGACCTTTCCTACAATCAGATTAAGGACATCGAACCTGGTGCGTTTGAGAGGCTGCTCAGCCTTGTTTCTGTGAATTTATCATTTAATGACAAGAAACTTCTTCTGTCGGGTCTTCCACCCCACCTGAAGCTCTTACCTGCTAGCGAAGCC…
40	Aves	Opisthocomus hoazin	XM_009931299	2625	ATGAGGATCCTTATTGGAAGCCTTCATTTCTACTTCATTTCTTTCTTCTTCAGTAGAGCAAATGGATTCCTAACTCTGAGAACACCTGCAGCCTATGCCTTCCCATTTTATAACTACTCCTATTTAAACCTCTCTTCTGTATCAGAAGCACAAGCTCCAAAAACGGCAAGAGCTCTCAATTTCTCACATAACATAATTGAAAAAATAAGCAAGAGAGACTTGGAAGGTTTTGATGCGCTGGAAGTTTTAGACCTTTCCCACAATCGGATTAAGAACATCGAACCCGGTGCGTTTGAGAGTCTGCTCAGCCTTGTTTCTGTGAATTTATCATTCAACCATAAGGAACTTCTTGCATCGGGTCTTCCACCCTACCTGAAGCTCTTACCCACCAGCAAAGCC…
41	Aves	Pelecanus crispus	XM_009492835	2628	ATGAGGATCCTTATTGGAAGCCTTCATTTCTACTTCATTTCTTTCTTACTCAGTAGAGCAAATGGATTCCTAACTCCAAGAACACCTACAGCCTATGCCTTCCCATTTTATAACTACTCCTATTTAAACCTCTCTTCGGTATCAGAAGCACAAGCTCCAAAAACAGCAAGAGCTCTCAATTTCTCACATAATGTAATTGAAAAAATAACCAAGAGAGACTTGGAAGGTTTTGACATGCTGGAAGTTTTAGACCTTTCCTACAATCGCATTAAGGGCATTGAACCTGGTGCGTTTGAGAGCCTGCTCAGCCTTGTTTCGGTGAATTTATCATTTAATGATAAGAAACTTCTTGTATCGGGTCTTCCACCCCACCTGAAGCTCTTGCCCACGAGCAAAGCC…
42	Aves	Phaethon lepturus	XM_010282406	2613	ATGAGGATCCTTATTGGAAGCCTTCATTTCTACTTCATTTCTTTCTTATTCAGTAGAGCAAATGGATTCCTAACTCTGAGAACACCTGCAGCCCATGTCTTCCCATTCTATAACTACTCCTATTTAAACCTCTCTTCTGTATCAGAAGCACAAGCTCCAAAAACAGCGAGAGCTCTCAATTTCTCACATAACGTAATTGAAAAAATAACCAAGAGAGACTTGGAAGGTTTTGATGCGCTGGAAGTTTTGGACCTCTCCTACAACCGGATTAAGGACGTTGAACCTGGTGCGTTTGAGAGTCTGCTCAGCCTTGTTTCTGCGAATTTATCATTTAATGATAAGAAACTTCTTGTATCGGGTCTTCCACCTCACCTGAAGCTCCTACCCACTGGGGCTTTG…
43	Aves	Phalacrocorax carbo	XM_009507639	2625	ATGAGGATCCTTATTGGAAGCCTTCATTTCCACTTCATTTCTTTCTTAGTCAGTAGAGCAAACGGATTCCTAACTCCAAGAACACCTACGGCCTACGCTTTCCCATCTTATAACTACTCCTATCTAAACCTCTCTTCTGTATCAGAAGCACAAGCTCCAAAAACAGCAAGAGCTCTCAATTTCTCACATAACGTAATTGAAAAAATAACCAAGAGAGACTTGGAAGGTTTTGACGTGCTGGAAGTGTTAGACCTTTCCTACAATCAGATTAAGGACATTGAACCTGGGGTGTTTGAGAGGCTGCTCAGCCTTGTTTCTGTGAATTTGTCATTTAATGATAAGAAACTACTTCTATTGGATCTTCCGCCCCACCTGAAGCTCTTACCTGCTAGCGAAGCC…
44	Aves	Picoides pubescens	XM_009902092	2556	ATGAGAATCCTTGTTGGAAGCCTTCATTTGTGCTTCATTTCTTTCTTATTCAGTAGACCAAATGGATTCCTGAGAACACCTACAGCCTGTGCCTTACTGGCATATAACTACTCTTATTTAAACCTCTCTTCTGTACCAGAAGCACAAGCTCCAAAAATGGCAAGAGCTCTCAATTTCTCACATAACCTAATTGAAAAAATAACCAAGAGAGACTTGGAAGGTTTTGAGGCGTTGGAAGTTTTAGACCTTTCCTACAATCAGATTAAGGAGATTGAACCTGGTGCATTTGAGAGTCTGCTCAGCCTTATCTCTGTGAATTTATCATTTAATGACAAGAAGCTTCTTGTCTCAGGTATTCCATCCAGCCTGAAGCTCTTAGCCACCAGCAAAGCCTTGGGC…
45	Aves	Pseudopodoces humilis	XM_005525475	2625	ATGAGGATCCTTCCTGGCTGCCTTCATTTCTACTTCATTCCTTTCTTACTCAGCAGAGCACATGGATTCCTAACGTGGAGAACAATTCCACCCTTCCTGGTTTATAACTACTCCTATTCAAATCTCTCCTCTGTCTCAGAAGCACAAGCTCCGAAAACAGCAAGAGCTCTCAATTTCTCACACAATGTCATCGAAAAAATTACCAAGAGAGACTTGGAAGGATTTGACTGGCTGGAAGTTCTGGACTTTTCCTACAATCAGATCAGGGCTGTTGAGCCTGGAGCTTTCCAGAGTCTGCTCAGTCTGGTTTCTGTGGATTTATCATTTAATGATCAAAAGCTGCTTCTGTCAGATCTCCCACCCCACCTGAAGCTCTCACCCACTGGCAAAGCTCTGGGG…
46	Aves	Pterocles gutturalis	XM_010085978	2673	ATGAAGATCCTTACTGGAAGTCTTCATTTCCACTTCATTTCTTTCTTATTCAGCAGAGCAAATGGATTCCTAACTCTGAGAACACCTACCACCGATGCCTCCCCATTTTATAACTACTCTTATTTAAACCTCTCTTCTATATCAGAAGCACAAGCTCCGAAGATGGCAAGAGCTCTCAATTTCTCACATAACATAATGGAAAAAATAACCAAGCAAGACTTGGAAGGTTTTGATGCGTTAGAAGTTTTAGACCTTTCCTACAATCGGATTAAGGACATTGAACCTGGTGCATTTGAGACCCTGCCCAGCCTTGTTTCTGTGAATTTATCATTTAATGATAACGAACTTCTTGTCTTGGGTCTGCCAGCCCATCTGAAGCCCGCACCCACCAGCGAAGCC…
47	Aves	Pygoscelis adeliae	XM_009319611	2625	ATGAGGATCCTTACTGGAAGCCTTCATTTCTACTTCATTTCTTTCTTATTCAGTAGAGCAAATGGATTCCCAACTCCGAGAACACCTACGGCCTATGCCTTCCCGTTTTATAACTACTCCTATTTAAACCTCTCTTCTGTATCAGAAGCACAAGCTCCAAAAACGGCAAGAGCTCTCAATTTCTCACATAATGTAATTGAAAAAATAACCAAGAGAGACTTGGAAGGCTTTGACACGCTGGAAGTTTTAGACCTTTCCTACAATCAGATTAAGGACATTGAACCTGGTGCGTTTGAGAGGCTGCTCAGCCTTGTTTCCGTGAATTTAGCATTTAATGCTAAGAAACTTCTCGTATCGGGTCTTCCGCCCCACCTGAAGCTCTTACCCACTAGCGAAGCC…
48	Aves	Serinus canaria	XM_009093733	2586	ATGAGGATCCTTCCTGGCTGCTTTCATTTCTGCTACATTCCTTTCTTACTCAGTGGGGCACATGGAGTCCTAATGTGGAGAACACCTCCAGTCTTCCTGGTTTATAACTACTCCTATTCAAATCTCTCCTCTGTCTCAGAAGCACGAGCTCCAAAAACAGCAAGAGCTCTCAATTTCTCACACAATGTCATTGAAAAAATTACCAAGGGAGACTTGGAAGGGTTTGATTGGCTGGAAGTTCTGGACTTTTCCTACAATAGGATCAGAGCTGTTGAGCCTGAAGCATTCCAGAGTCTGCTCAGCCTGGTTTCTGTGGATTTATCATTTAATGATGAGAAGCTGCTTCTGTCAGATCTCCCACCCCACCTGAAGCTCTCACCTGCTGGCAAAGCTCCGAGG…
49	Aves	Struthio camelus australis	XM_009669051	2625	ATGAGGATCCTTATTGGAAAACTTTATTTCTACCTCATTTCTTTTTCATTCAGTAGAACAAATGGGTTCTTAACTTGGAGAACATCTAGAGCGTATGCCTTCCAATTTTATAACTACTCTTATTTAAACCTCTCTTCTGTATCAGAAGCACATGGTCCAAAAACGGCAAGAGTTCTCAATTTCTCACATAATGTGATTGAAAAAATAGCCAAAAGAGACTTTGAAGGTTTCGATGCGCTGGAAGTTTTAGATCTTGCCTACAATCAGATTAAGGACGTTGAACCTGGTGCGTTTGAGAATTTACTCAGCCTTGTTTCTGTGAATTTTTCATTTAATGATAAGAAACTTGATGTAACTGGTCTTGCATCTCATCTAAAACTACTACCGACTGGAGAAGGC…
50	Aves	Taeniopygia guttata	XM_002197069	2625	ATGAGGATCCTTCCTGGCTACCTTCATTTCTACTTCATTCCTTTCTTACTCAGTGGGGCACGTGGATTCCTAATGTGGAGAACACCCCCAGCTTTCCTGGTTTATAACTACTCCTATTCAAATCTCTCCTCTGTCTCAGAAGCACAAGCTCCAAAAACAGCAAGAGCTCTCAATTTCTCACACAATGTCATTGAAAAAGTTACCAAGGGAGAATTGGAAGGATTTGACTGGCTGGAAGTTCTGGACTTTTCCTACAATCAGATCAGGGCTGTTGAGCCTGGAGTGTTCCAGAGTCTGCTCAGCCTGGTTTCTGTGGATTTATCATTTAATGATGAGAAGCTGCTTTTGTCAGATCTCCCATCCCACCTGAGGCTCTCACCTGCTGGCAAAGCACCAAGG…
51	Aves	Tauraco erythrolophus	XM_009979140	2622	ATGAGGATCCTTATCGGAAGCCTTCACTTCTACTTCATTTCTTTCTTATTCAGCAGAACAAATGGATTCCTAACTCTGAGAACACCTACAGCCCATGCCTTCCCGTTTTATAACTATTCCTACTTAAACCTTTCCTCTGTATCAGAAGCACAAGCTCCAAAAAGAGCAAGGGCTCTCAATTTCTCACATAACGTAATTGAAAAAATAACCCAGAGAGACTTGGAAGGTTTTGACACGCTGGAAGTTTTAGACCTTTCCTACAACCGGATCAAGGACGTTGAACCTGGTGCGTTTGAGAGGCTGCTCAGCCTGGTTTCTCTCAATTTATCATTTAATGATAAGAAACTGCTTGTTTTGGGTCTTCCACCCCACCTGAAGCTCTTACCCACCAGCGAAGCC…
52	Aves	Tinamus guttatus	XM_010218127	2637	ATGAGGATCCTTATTGTTGGAAGACTTCATTTCTACCTCATTTCTCTTTTATTCAGTATTTTATTCAGTACAGCAAATGGACTTCTAACTTGGAGATCATCTAGAATGTTTTTTCAGTTTTATGACTATTCTTATTCCAACTTCTCTTCTGTATCAGAAGCCCAAGCTCCCCAAACCGCAAGAGTTCTCAATTTATCACATAACATGATTGAAAATATAACCAAAAGAGACTTTGAAGGTTTTGATGCACTGGAAGTTTTAGACCTTGCCTACAACCAGCTTAAGTATGTTGAACCTGGTGTGTTTGAGAATTTACTCAACCTTGTTTCTGTCAATTTTTCATTTAATGATAAGCAACTTGATGTACTGGGTCTTGCATCTCGTCTAAAACTACTACCA…
53	Aves	Tyto alba	XM_009975442	2616	ATGAGGATCCTTACTGGAAACCTTCATTTCTACTTCATTTCTTTCTTATTCAGTAGAGCAAATGGATTTCTAACTCGGAGAAAACCTACAGGCTATGCCTTCCCGTTTTATAACTACTCCTATTTAAACCTCTCTTCTCTATCAGAAGCACAAGCTCCAAAAACAGCAAGAGCTCTCAACTTCTCACATAACATAATTGAAAAAATAACCAAGAGAGACTTGGAAGGTTTTGACGCGCTGGAAGTTTTAGACCTTTCCTACAACTGGATTAAGGACATTGAACCTGGAGTGTTTGAGAGTCTGCTCAGCCTTGTTTCTATGAATTTATCATTTAATGATGAGAAACTTCTTGTATCAGGTCTTCCACCCCACCTGGAGCTCTTACCCACTAGCAAAGCC…
54	Aves	Zonotrichia albicollis	XM_005486787	2625	ATGAAGATCCTTCCTGGCTGCCTTCATTTCTACTTCATTCCTTTCTTACTCAGCGGGGCACATGGATTCCTAACGTGGAGAACACCTCCAGCCTTCCTGGTTTACAACTACTCCTATTCAAATCTCTCCTCTGTCTCAGAAGCACGGGCTCCAAAAACAGCAAGAGCTCTCAATTTCTCACACAATGCCATTGAAAAAATTACCAAGGGAGACTTGGAAGGATTTGACTGGCTGGAAGTTCTGGACTTTTCCTACAATCGGATCAGGGCTGTTGAGCCTGGAGCATTCCAGAGTCTGCTCAGCCTGGCTTCTGTGGATTTATCATTTAATGATGAGAAGCTGCTTCTGTCAGATCTCCCACCCCACCTGAAGCTCTCACCTGCTGGCAAAGCTCCGAGG…
55	Reptiles	Alligator mississippiensis	XM_006274445	2628	ATGGGTATCCTCATTCTTCGTTTCTACCTCATTGCTTTTTTATTTAATGGAGCAGATGGATTCCAAACTCAAAGAACATCTCATATGTATGGCTTCAAATTTTCTAACTACTCTTACTTAAACCTTTCATCTATACATGAGGCACAAGCTCCAAAAACTTCAAGAGTCCTCAATTTCTCACATAATGTTATTGAAAAAATAACCAGAAGAGACTTTGAAGGGTTTGTTGCTCTGGAAGTTTTAGATCTTTCCTACAATCAGATTCAGGACATTGAACCTGGTGCCTTTGAGAACCTACTCGGCCTTGTTTCTGTAAATCTTTCATTTAATGACCACTTGCACAGAATTCCTTATCTTGCACCTCATTTAACGTTCTTACAAACAGGTGAAACTTCTGGG…
56	Reptiles	Alligator sinensis	XM_006021588	2628	ATGGGTATCCTCATTCTTCGTTTCTACCTCATTGCTTTTTTATTTAATGGAGCAGATGGATTCCAAACTCAAAGAACATCTTATATGTATGGCTTCAAATTTTCTAACTACTCTTACTTAAACCTTTCATCTATACATGAGGCACAAGCTCCAAAAACTTCAAGAGTCCTCAATTTCTCACATAATGTTATTGAAAAAATAACCAGAAGAGACTTTGAAGGGTTTGTTGCTCTGGAAGTTTTAGATCTTTCCTACAATCAGATTCAGGACATTGAACCTGGTGCCTTTGAGAACCTACTCGGCCTTGTTTCTGTAAATCTTTCATTTAATGACCAGTTGCACAGAATTCCTTATCTTGCACCTCATTTAACATTCTTACAAACAGGTGAAACTTCTGGG…
57	Reptiles	Python bivittatus	XM_007444506	2169	ATGACATTGCCTCCTATGCCCGCAGAGAAGCAGCAAGGAGCTGATGGCCTTTTAAATCTCAGTTCAGTGTTAAAGTGGAATGTTCTTGGCAATGAACGACACAATGAAAAGGGAACAAGATTTCCATCCTCAGTATTGCAGATTAATGCAAGCTGTGGAATCCCAGCAAATGGCACACTGGATCTATTAAACAAAAAACTAACTGAGAATGAATTGAGGGAGAAAATGGATCCTAAACTCTGCAAAGCTACAATGGACAAAATTAAAAAGTTTAATGCCAGTCACAACAACATGGAGACAGATATTGCAACCCTGATTTCAGTATTCCTTGAAATGAAGAATGTGTATTTAACTGATGTGAGTTATAACAAAATATCCATAAATGCCAAATCTGCAAAA…
